# Supplementary material
Source: PubMed Central journal article supplement (PMC8132177)

**A**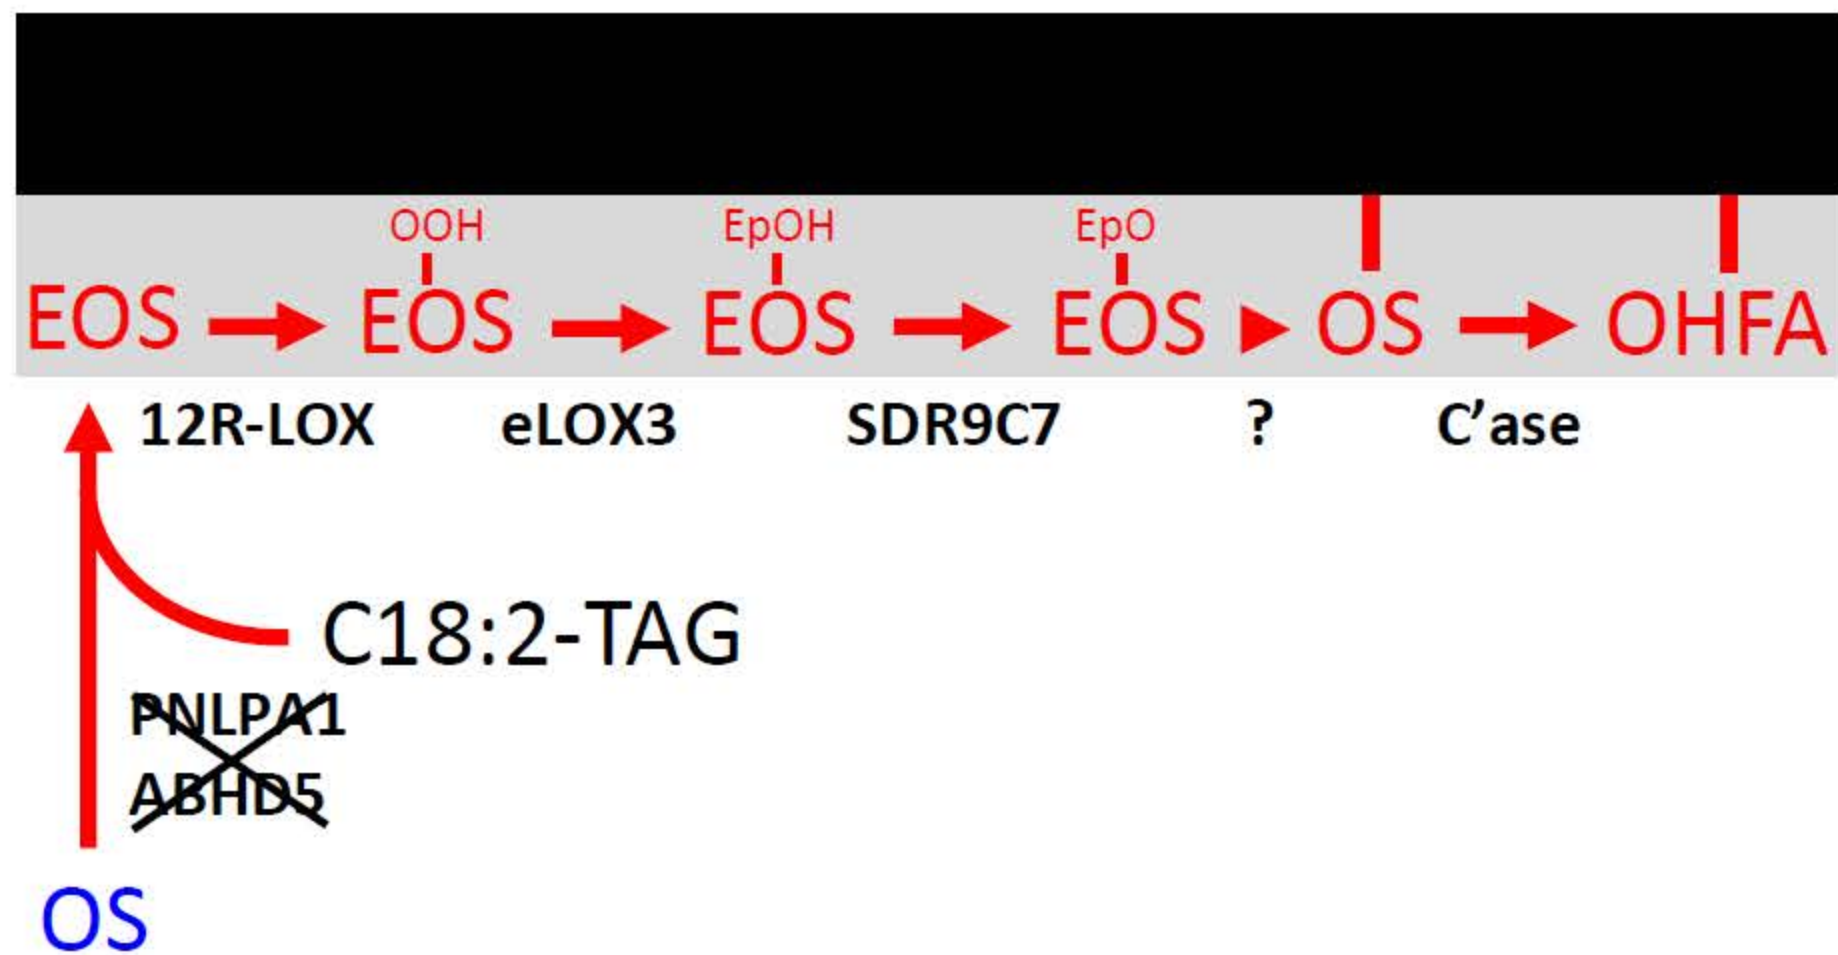**B**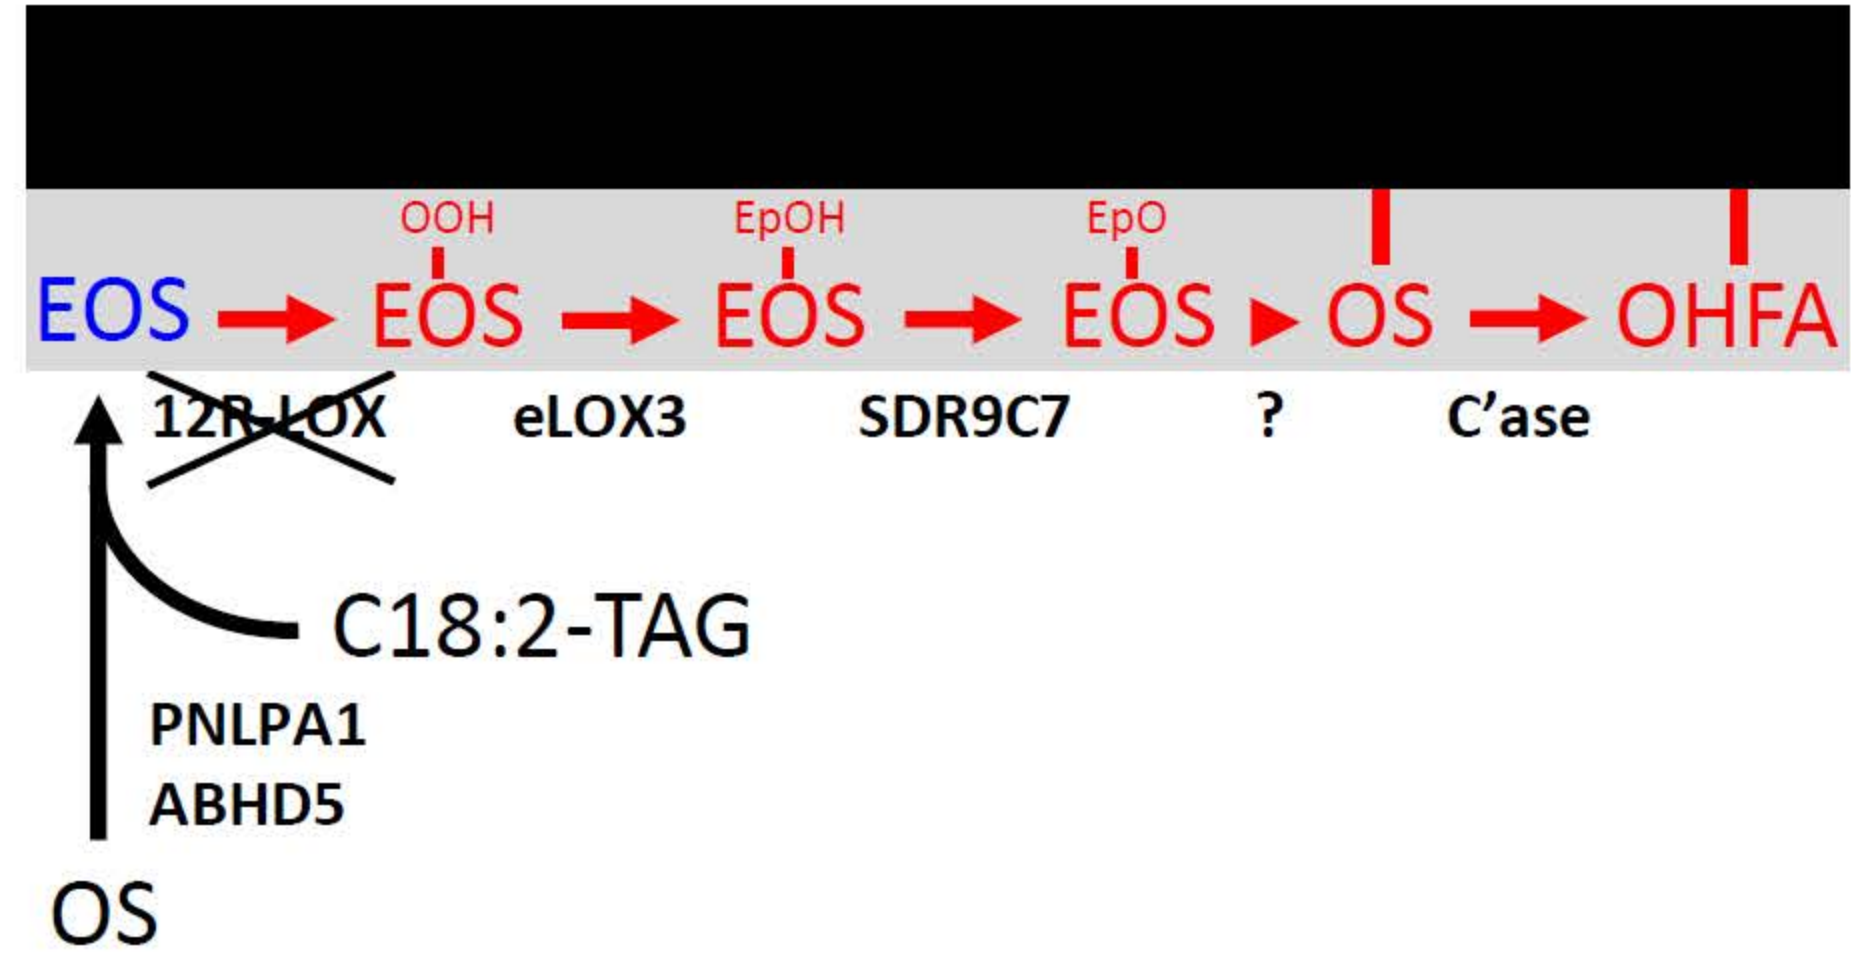

Supplement: mmc1.pdf [file mmc1.pdf]

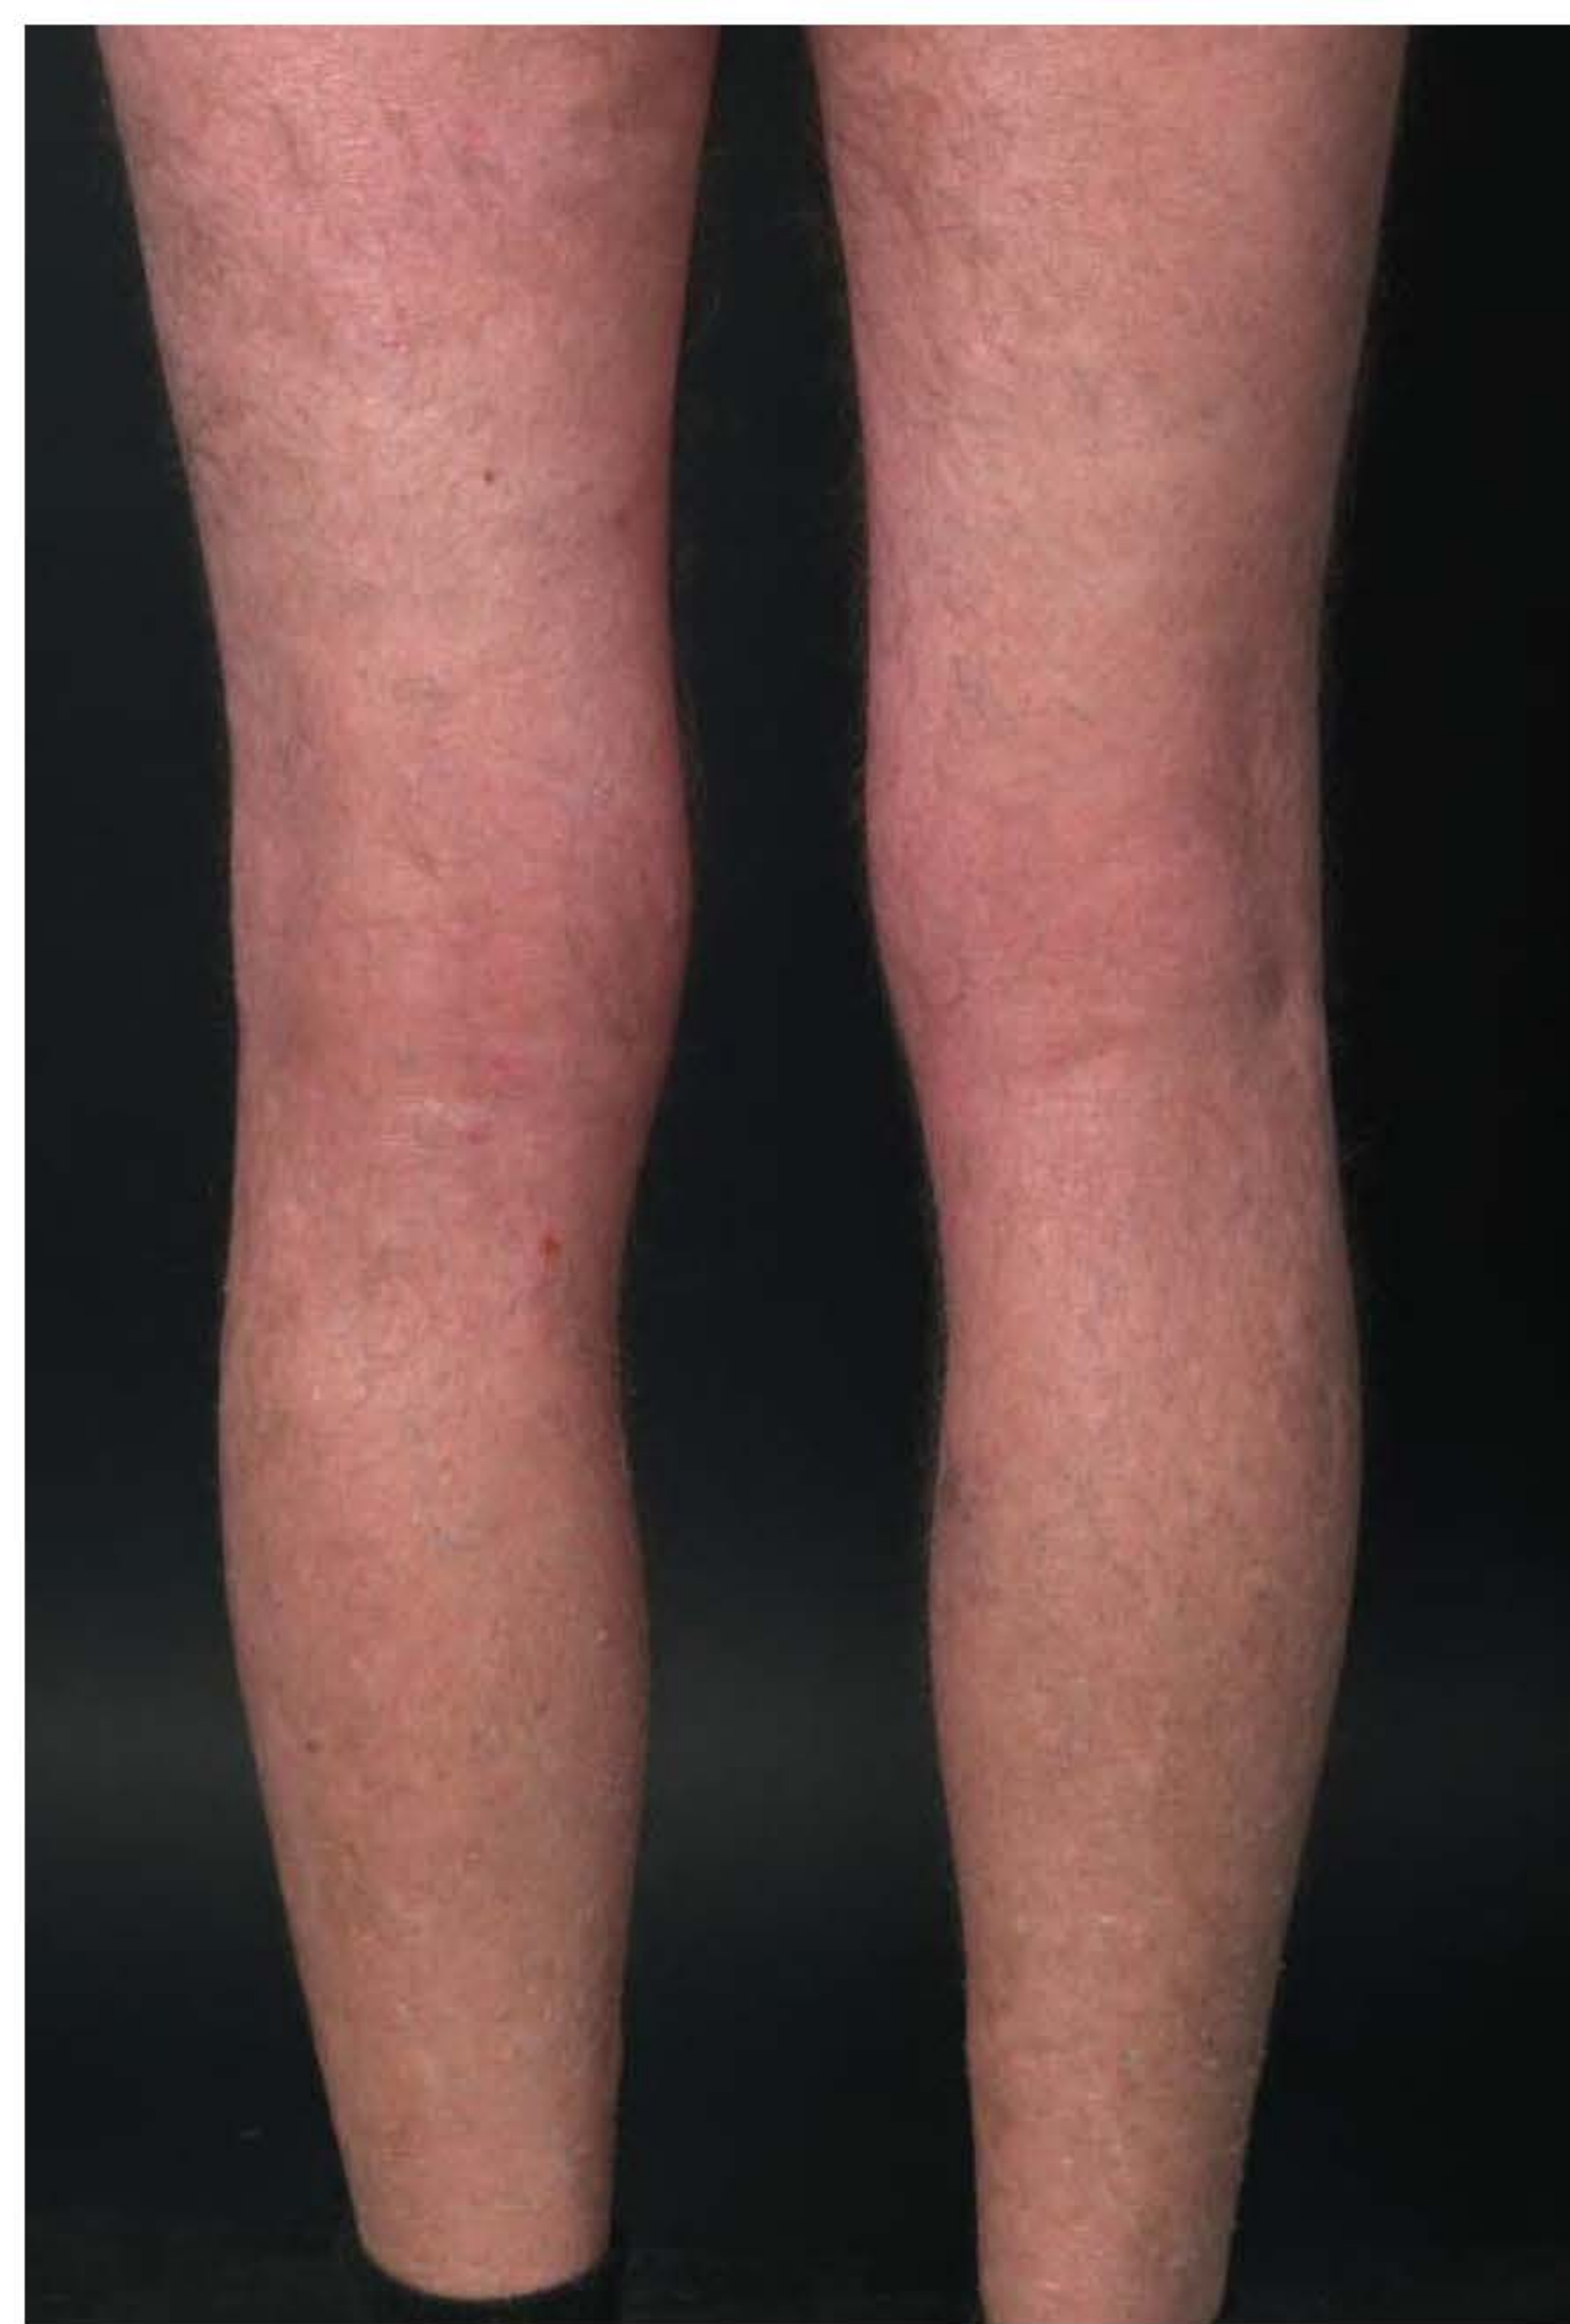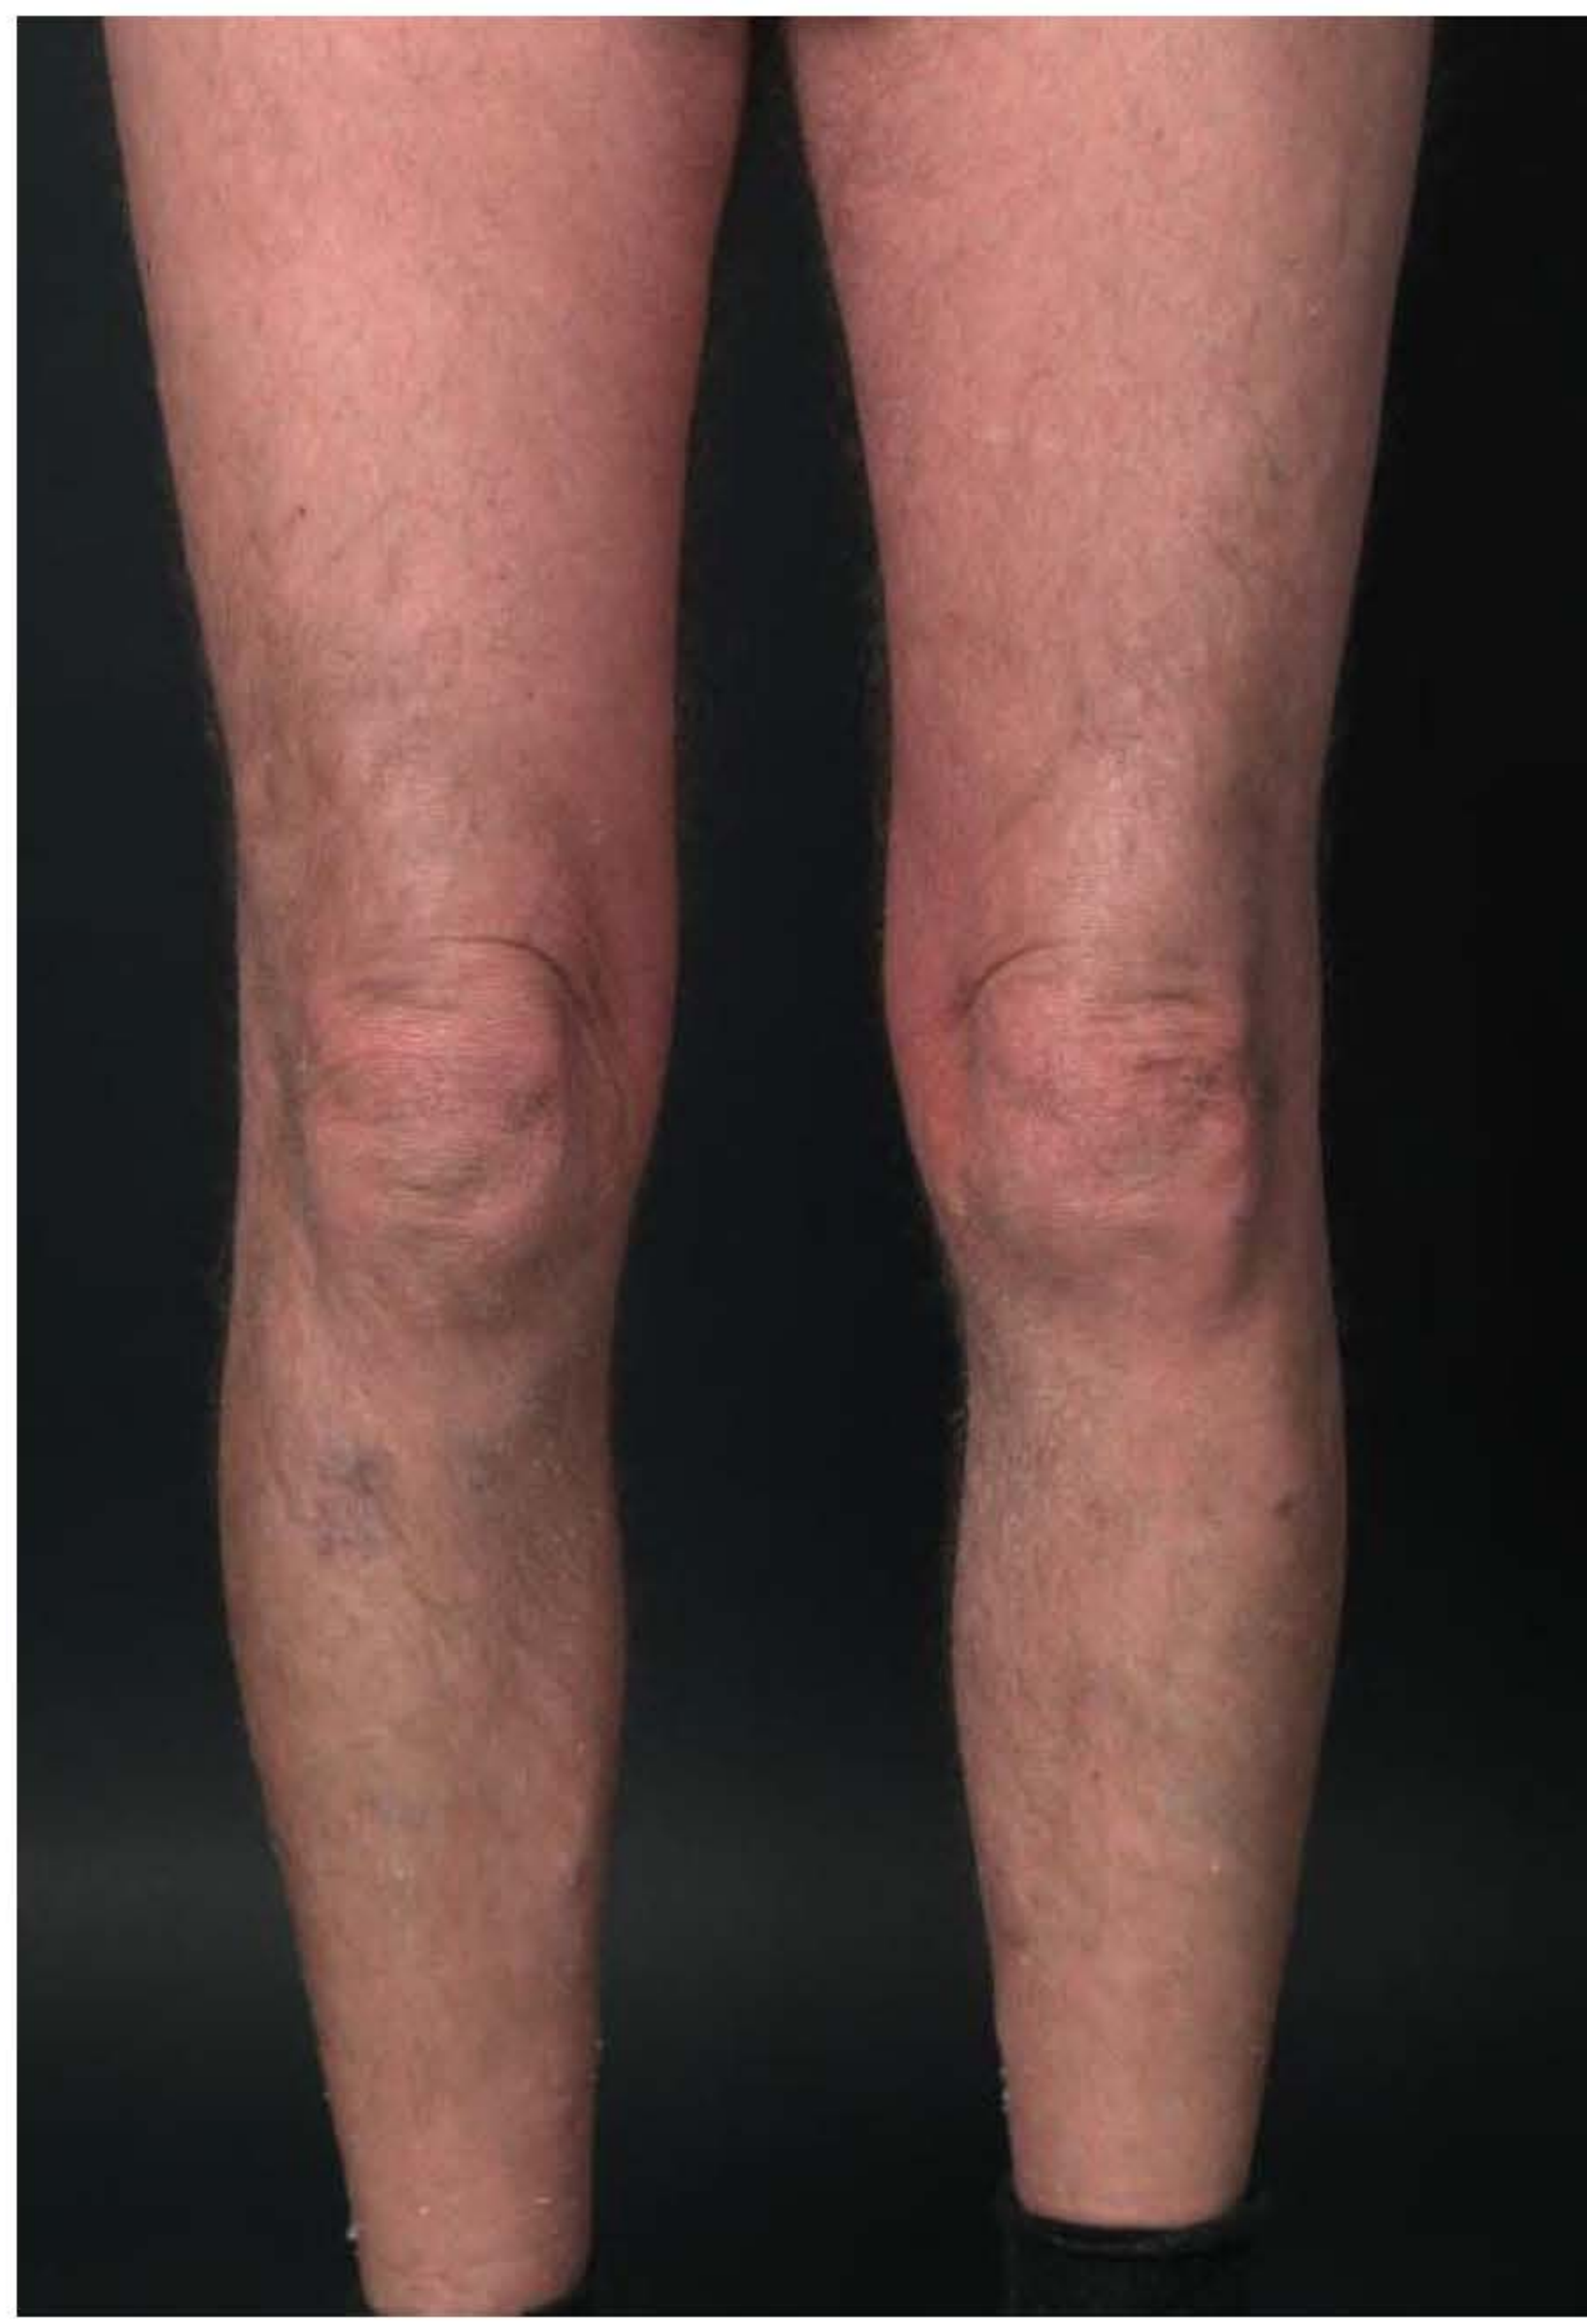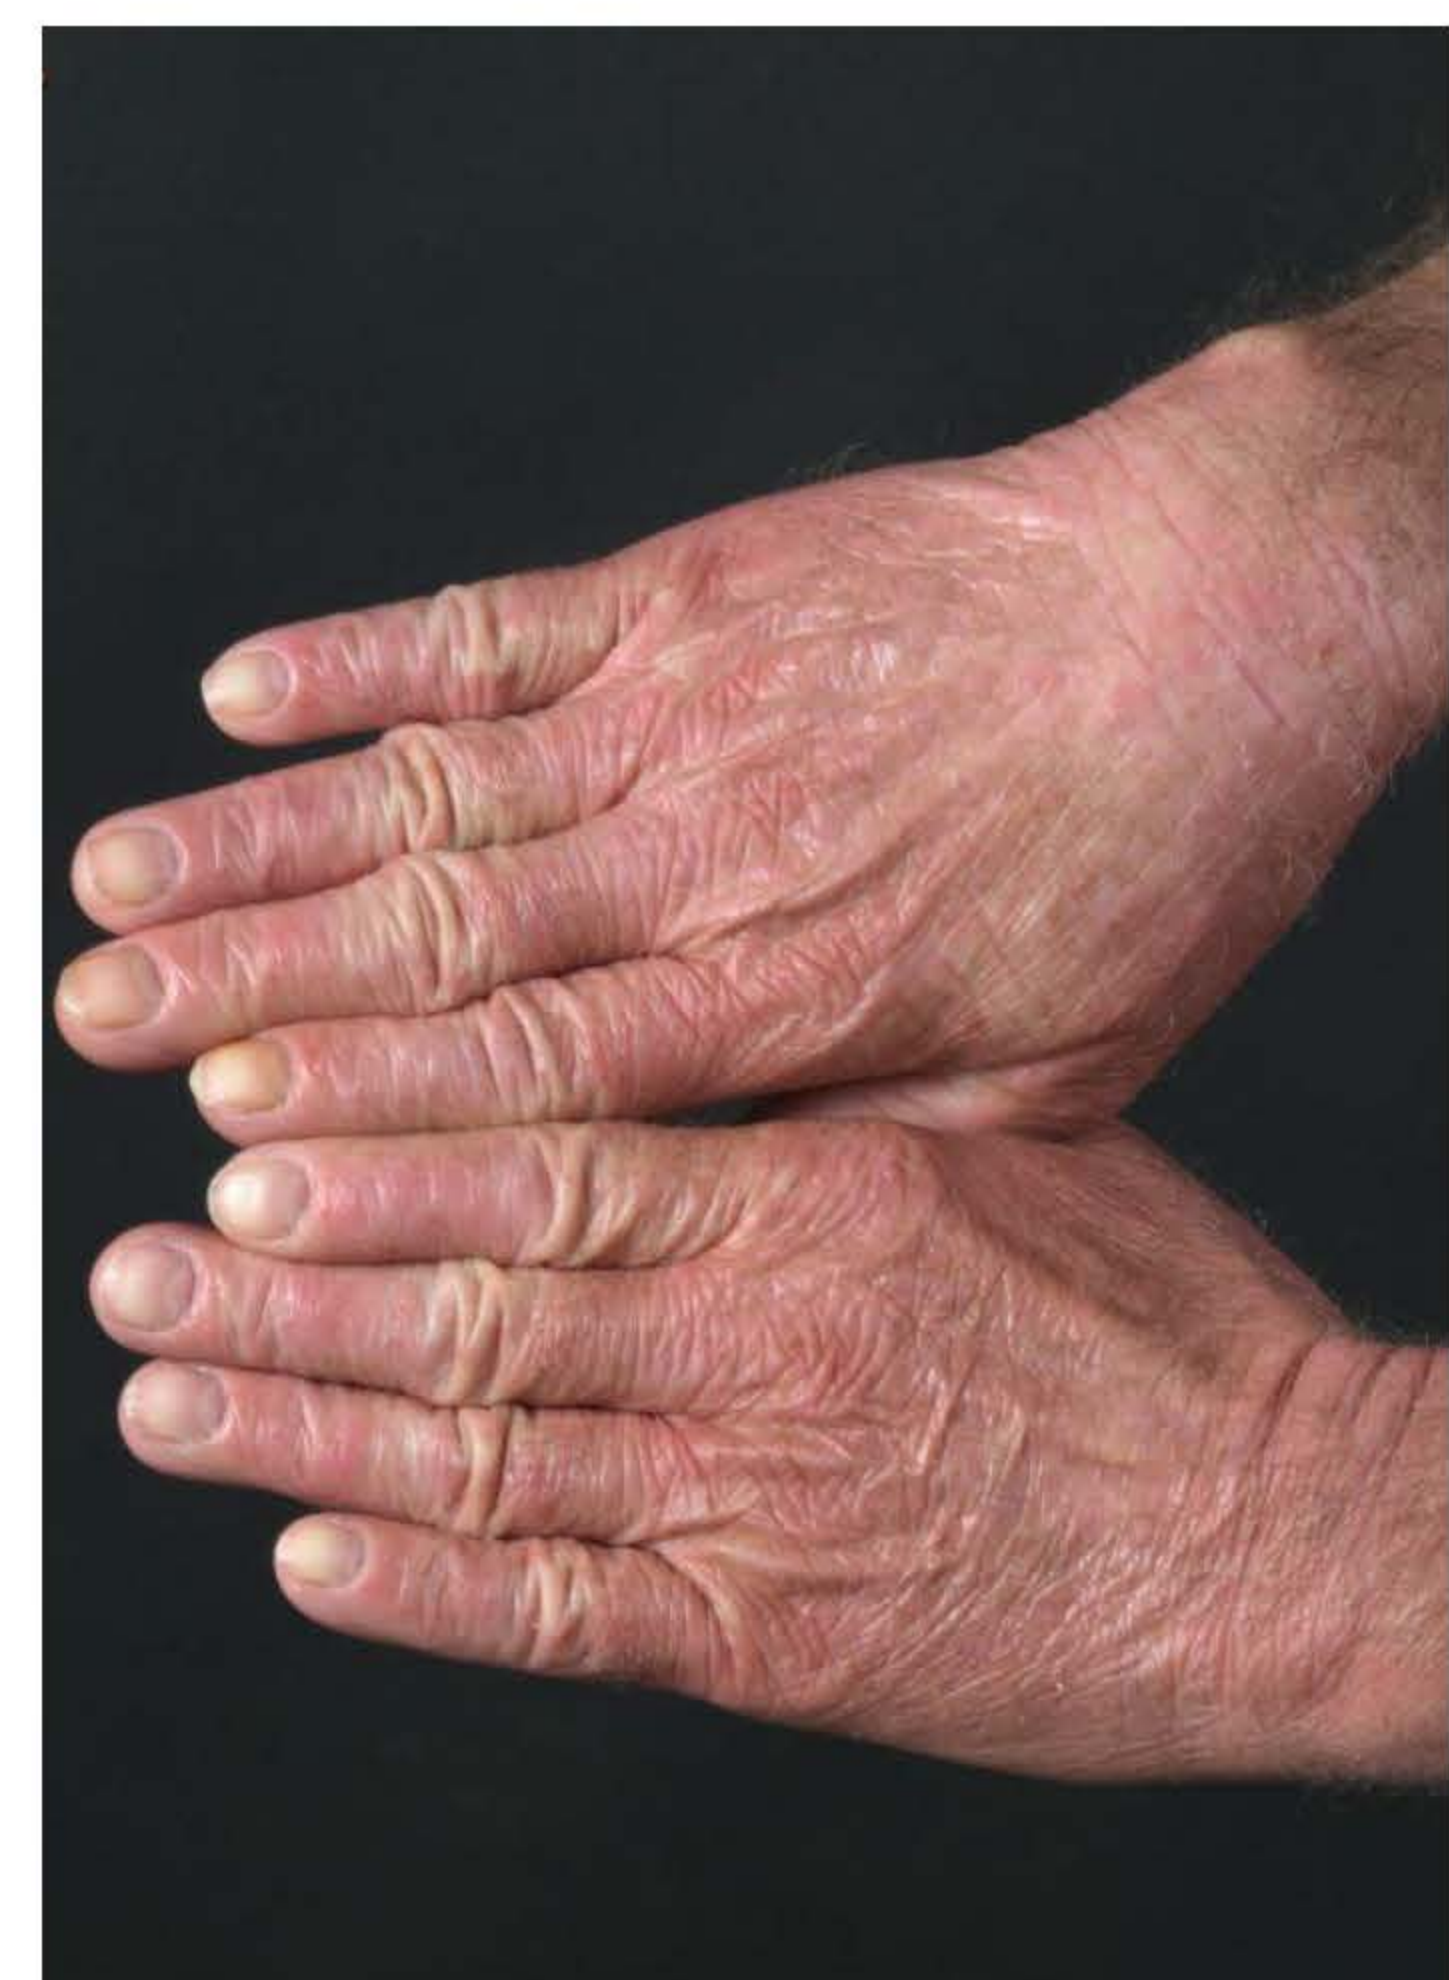

Supplement: mmc2.pdf [file mmc2.pdf]

**A** *Alox12b*<sup>+/+</sup>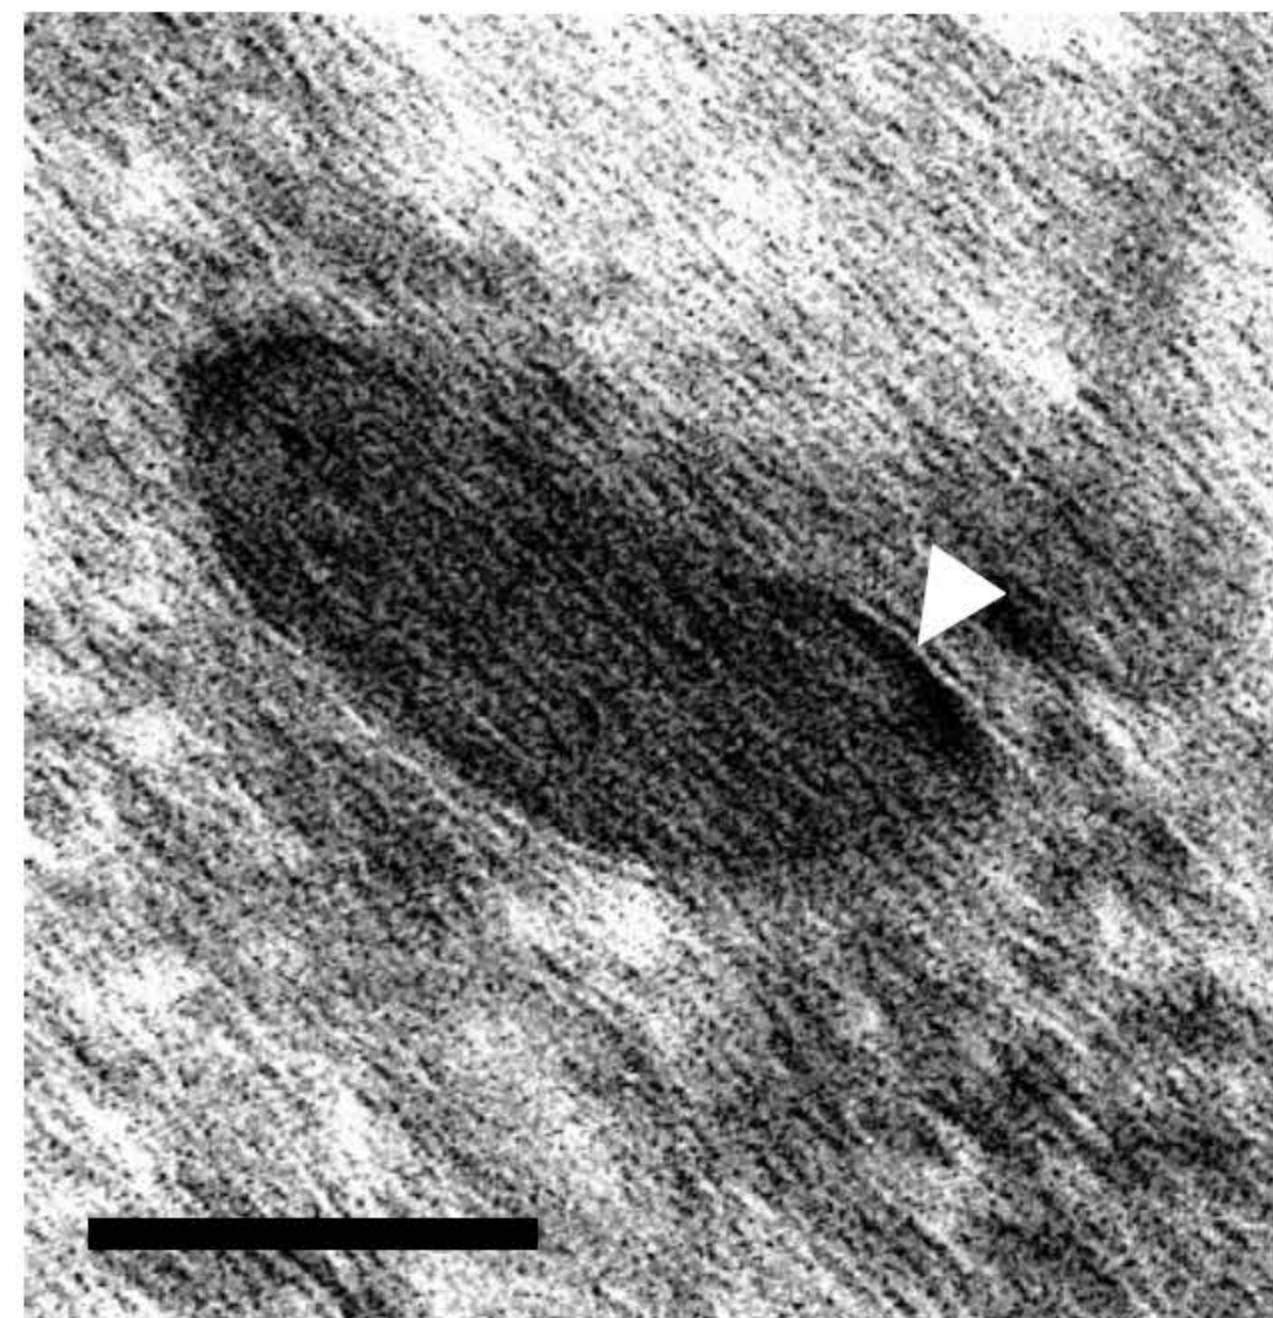**B** *Alox12b*<sup>-/-</sup>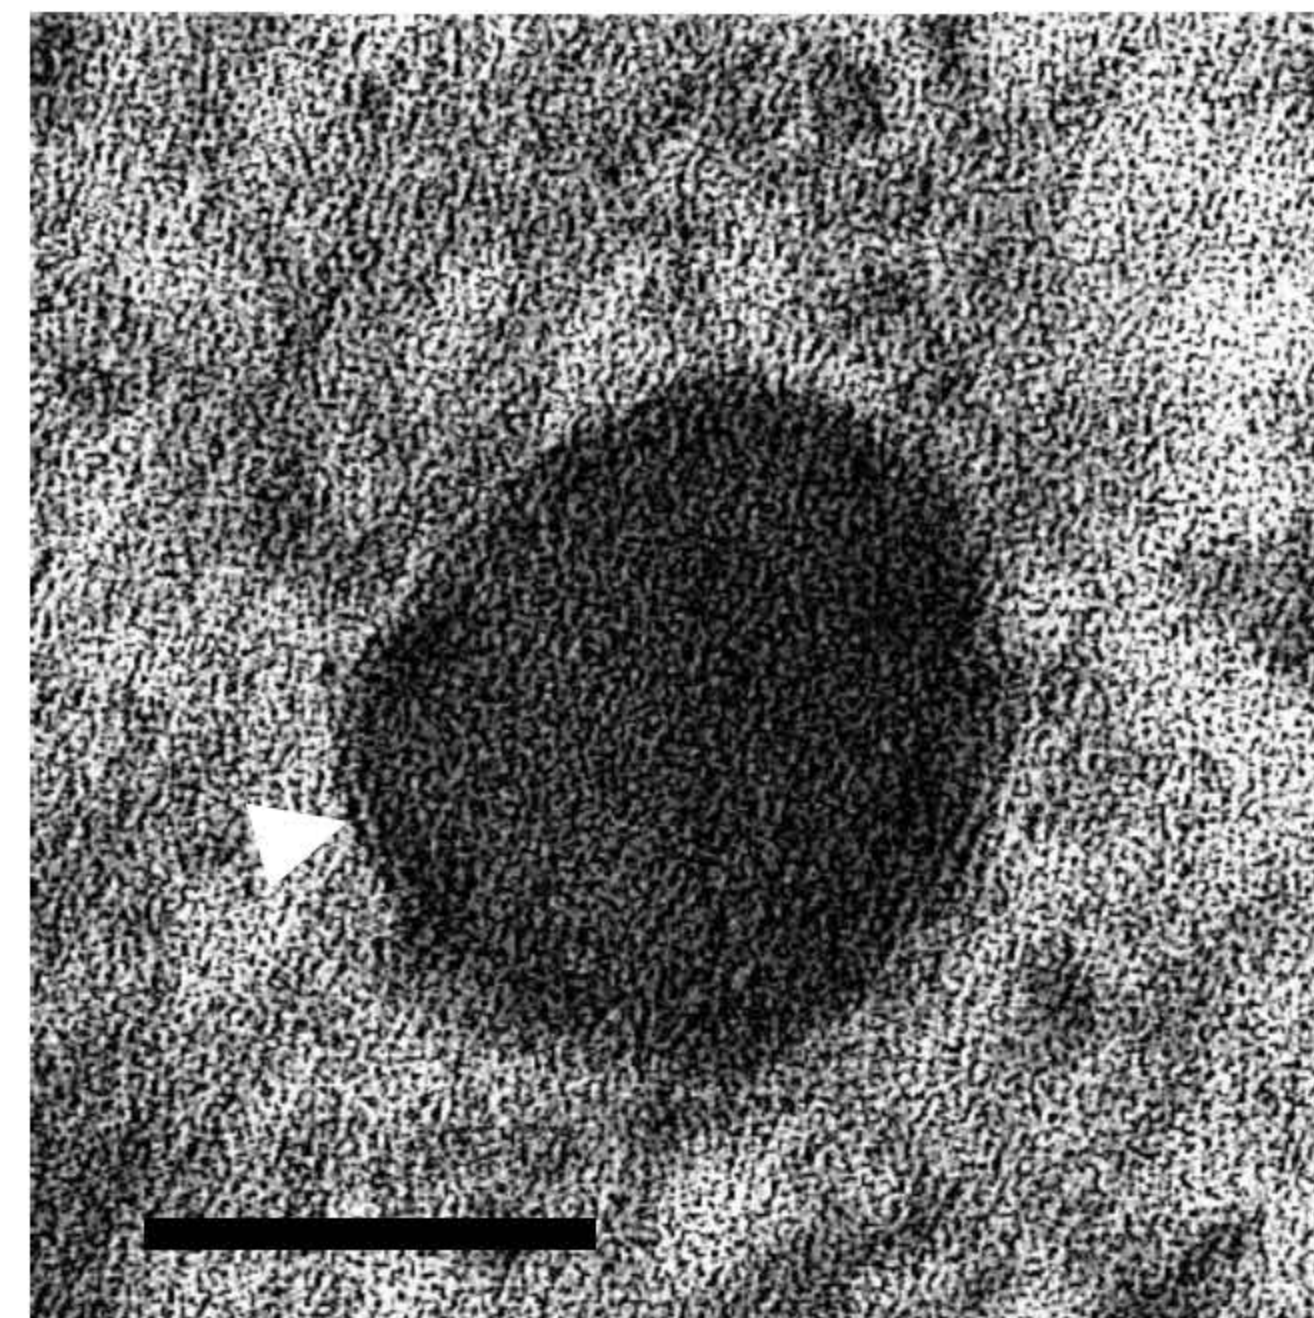**C** Thickness of LB limiting membranes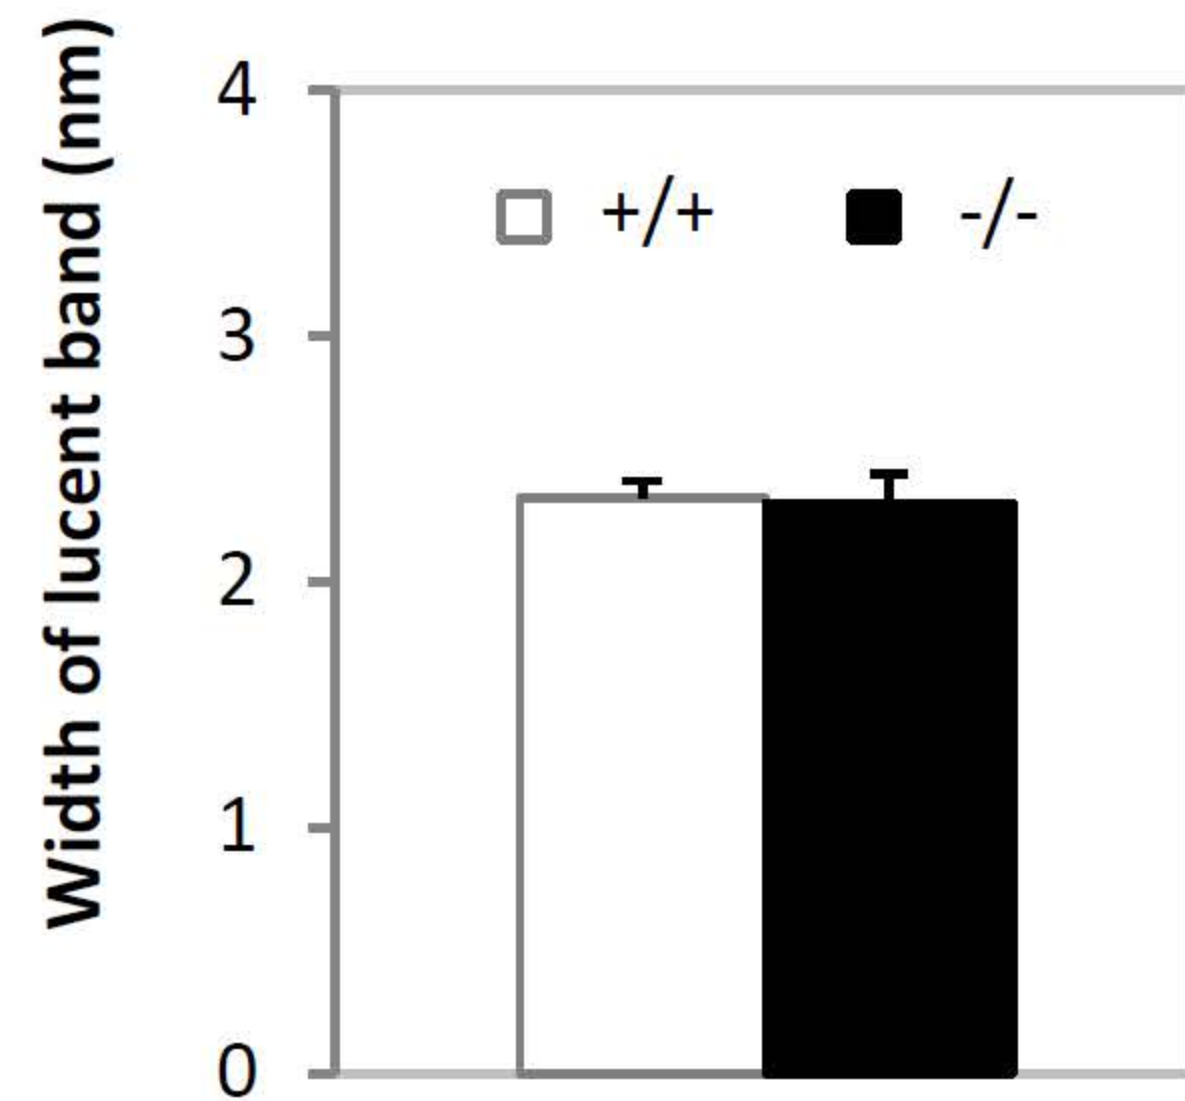

Supplement: mmc3.pdf [file mmc3.pdf]
